# Supplementary material
Source: HighWire-hosted journal article supplement (https://jech.bmj.com/content/70/11/1082)
Supplement: inline-supplementary-material-1 [file inline-supplementary-material-1.pdf]

### **Supplementary Text S1: Exclusions and representativeness of the final study sample**

Some children aged 2-4 years on the 31<sup>st</sup> August 2014 and registered in a THIN practice on the 31<sup>st</sup> January 2015 were not included in the final study sample due to missing data or because they were not registered with a THIN practice meeting quality criteria since before their first birthday. Also, only one child per family was included – one child per family was therefore randomly selected.

Figure S1 outlines the number of children excluded at each stage.

Children not excluded at random ( $n=31,240$ ) were similar in terms of gender (48.5% of children excluded were girls compared to 48.8% of children in the study ( $\chi^2 p = 0.39$ )). Excluded children were significantly older, although the absolute difference was small; the mean age of children in the study was 3.0 years compared to 3.1 years among children who were excluded  $t$ -test  $p < 0.001$ . Excluded children were less likely to be vaccinated, yet the absolute difference was small: 39% in the cohort cf. 34% among children who were excluded. The slightly lower uptake among children who were excluded is partly due to excluding children who were registered in a THIN practice during the autumn of 2014. Hence they may have been vaccinated in another GP practice, but this is not captured in THIN.

Children aged 2-4 years on the 31<sup>st</sup> August 2014 registered with a THIN practice on the 31<sup>st</sup> January 2015  
*n*=93,724

Exclude: children registered after their first birthday  
*n*=24,559

Exclude: children with missing information on number of children in household  
*n*=2,668

Exclude (at random): more than one child per family  
*n*=4,939

Exclude: children with missing Townsend score  
*n*=3,887

Exclude: children with missing rurality indicator  
*n*=126

Final sample  
*n*= 57,545 children
